# Supplementary material
Source: PubMed Central journal article supplement (PMC7171235)
Supplement: IAI.00002-20-s0003.pdf [file IAI.00002-20-s0003.pdf]

**TABLE S2.** The reaction mixture for the PCR assays.

| PCR mixture components                    | Volume        |
|-------------------------------------------|---------------|
| Buffer 10X                                | 2.5 $\mu$ L   |
| MgCl <sub>2</sub> 25 mM                   | 0.75 $\mu$ L  |
| dNTP (deoxynucleoside triphosphate) 20 mM | 4 $\mu$ L     |
| Primer 1 10 $\mu$ M                       | 1 $\mu$ L     |
| Primer 2 10 $\mu$ M                       | 1 $\mu$ L     |
| Taq polymerase 5 U/ $\mu$ L               | 0.1 $\mu$ L   |
| DNA                                       | 2 $\mu$ L     |
| H <sub>2</sub> O                          | 13.65 $\mu$ L |
