# Supplementary material
Source: PubMed Central journal article supplement (PMC7171235)
Supplement: IAI.00002-20-s0004.pdf [file IAI.00002-20-s0004.pdf]

**TABLE S3.** Program used for DNA amplification.

| PCR Step             | Times and temperatures |              |
|----------------------|------------------------|--------------|
| Initial denaturation | 5 min - 94°C           |              |
| Cyclic denaturation  | 30 sec - 94°C          | } x25 cycles |
| Cyclic hybridization | 30 sec - 60°C          |              |
| Cyclic elongation    | 1 min - 72°C           |              |
| Final elongation     | 5 min - 72°C           |              |
